# Supplementary material for: Dual Ureaplasma parvum arthritis: a case report of U. parvum septic arthritis following contralateral reactive arthritis in an immunosuppressed patient
Source: Springer Nature journal article supplement (doi:10.1186/s12879-021-06733-0), 2021-10-29

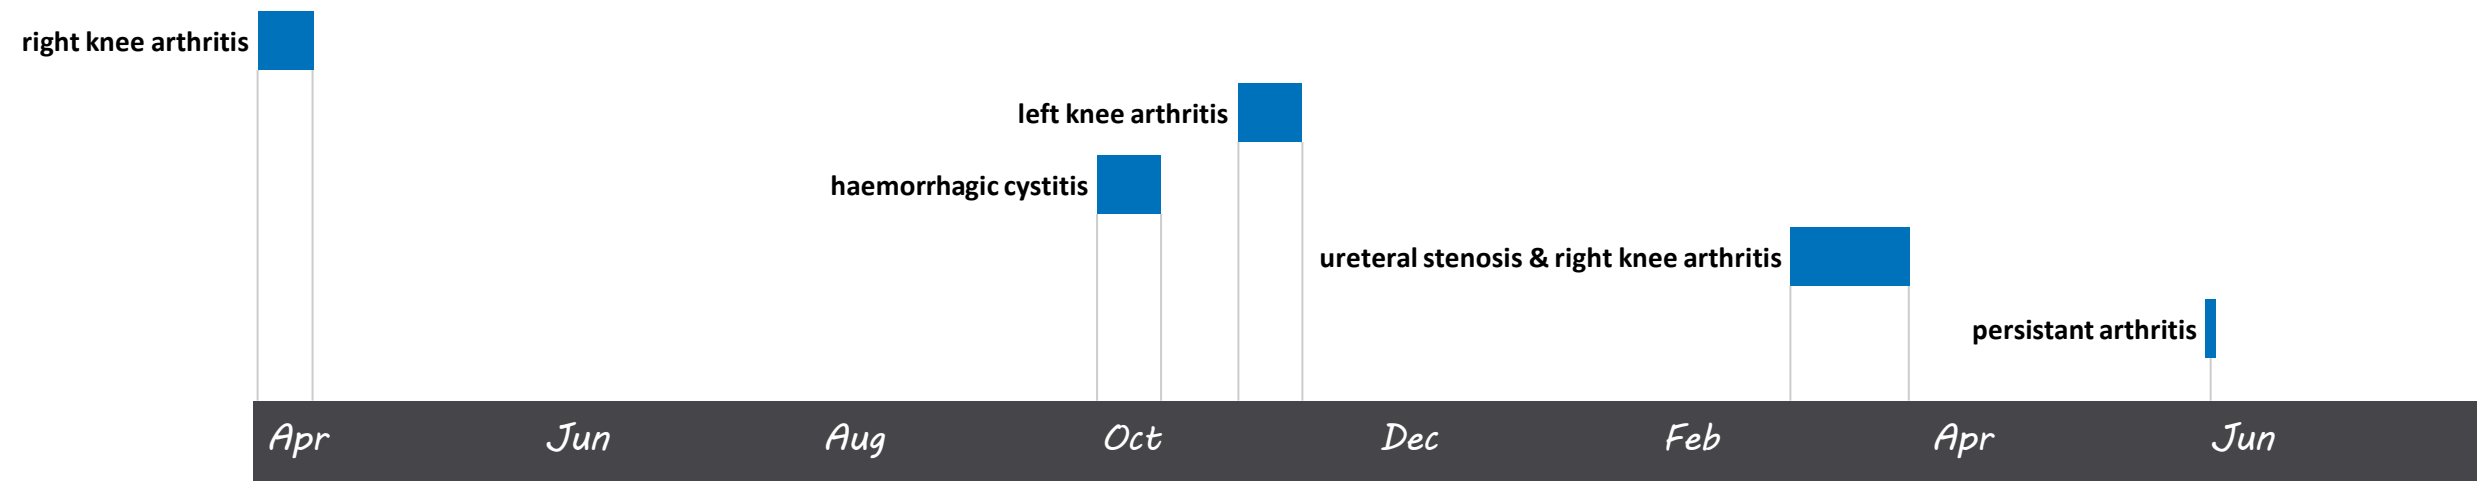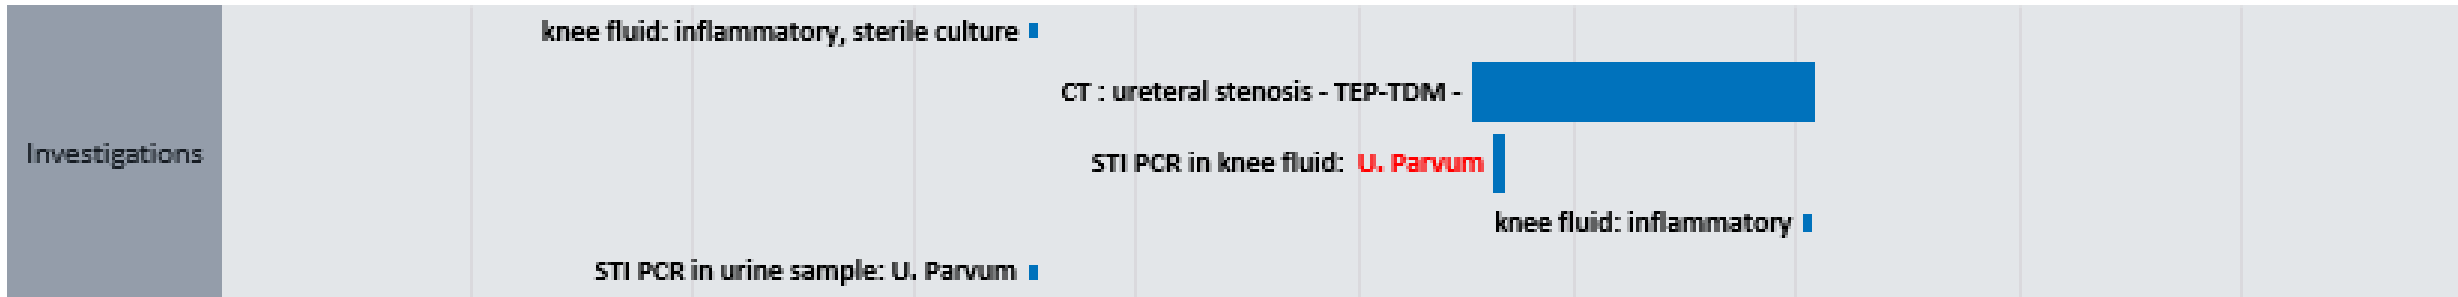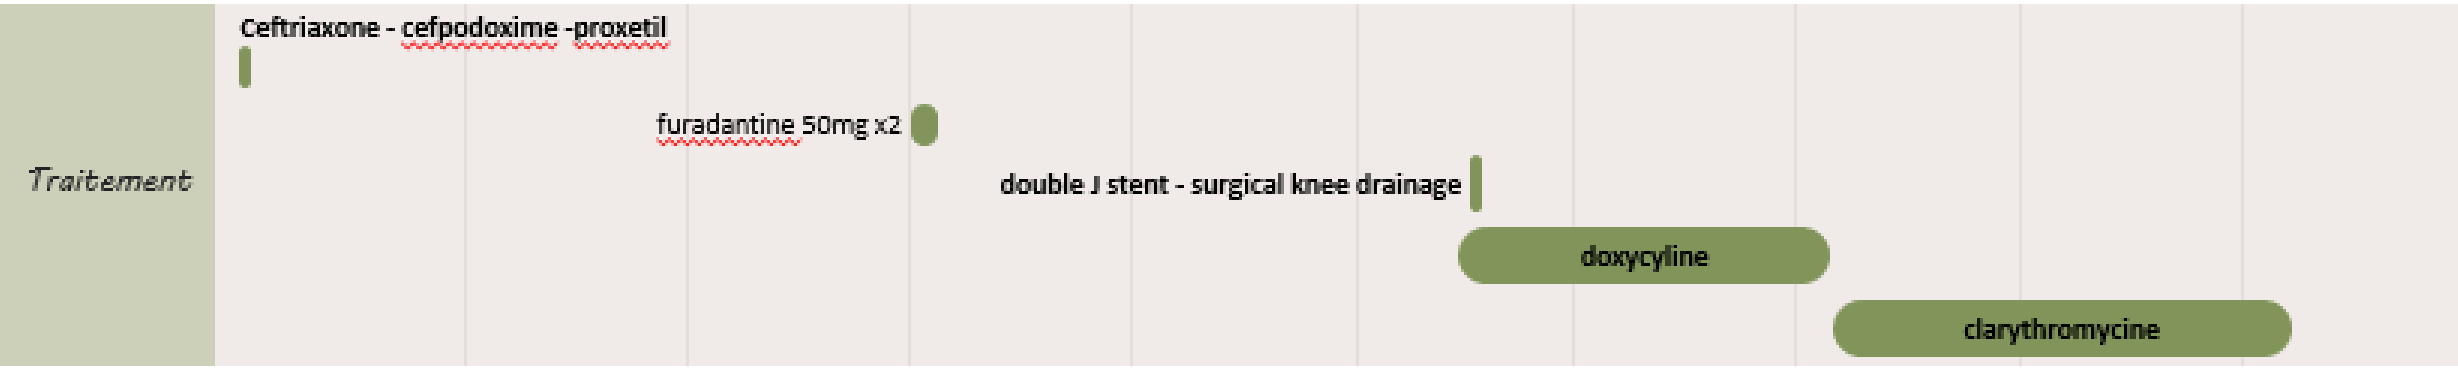

Supplement: MOESM1 [file 19811796]
